1 *Original Article*

2 **Cell-of-Origin Analysis of Metastatic Gastric Cancer Uncovers the Origin of Inherent Intratumor**  
3 **Heterogeneity and a Fundamental Prognostic Signature**

4  
5 Ruiping Wang<sup>1</sup>, Shumei Song<sup>2</sup>, Kazuto Harada<sup>2</sup>, Guangchun Han<sup>1</sup>, Melissa Pool Pizzi<sup>2</sup>, Meina Zhao<sup>2</sup>,  
6 Ghia Tatlonghari<sup>2</sup>, Shaojun Zhang<sup>1</sup>, Yuanxin Wang<sup>1</sup>, Shuangtao Zhao<sup>1</sup>, Brian D. Badgwell<sup>3</sup>, Mariela  
7 Blum Murphy<sup>2</sup>, Namita Shanbhag<sup>2</sup>, Jeannelyn S. Estrella<sup>4</sup>, Sinchita Roy-Chowdhuri<sup>4</sup>, Ahmed Adel Fouad  
8 Abdelhakeem<sup>2</sup>, Guang Peng<sup>5</sup>, George A. Calin<sup>6</sup>, Samir Hanash<sup>5</sup>, Alexander J. Lazar<sup>1,4,7</sup>, Andrew Futreal<sup>1</sup>,  
9 Jaffer A. Ajani<sup>2\*</sup>, Linghua Wang<sup>1\*</sup>

10  
11 Department of <sup>1</sup>Genomic Medicine, <sup>2</sup>Gastrointestinal Medical Oncology, <sup>3</sup>Surgical Oncology, <sup>4</sup>Pathology,  
12 <sup>5</sup>Clinical Cancer Prevention, <sup>6</sup>Experimental Therapeutics, and <sup>7</sup>Translational Molecular Pathology — all  
13 at The University of Texas MD Anderson Cancer Center, Houston, Texas, 77030.

14  
15 \*These authors jointly supervised this work.

16 **Correspondence:** Linghua Wang, MD, PhD, Tel: +1-713-563-2293, Email: [LWang22@mdanderson.org](mailto:LWang22@mdanderson.org),  
17 Department of Genomic Medicine; Jaffer A. Ajani, MD, Tel: +1-713-792-2828, Email:  
18 [ajani@mdanderson.org](mailto:ajani@mdanderson.org), Department of Gastrointestinal Medical Oncology, The University of Texas MD  
19 Anderson Cancer Center, 1515 Holcombe Blvd., Houston, TX 77030, USA.

20  
21 **Conflicts of interest:** The authors have no potential conflicts of interest to disclose.

22 **Number of Figures:** 5; Extended Data Figures: 9; Supplementary Tables: 5

23 **Word count:** 2,478

24 **References:** 32

25

26 **Abstract:**

27 Intra-tumoral heterogeneity (ITH) is the fundamental property of cancer, however, the origin of  
28 ITH remains poorly understood. Here we performed single-cell RNA sequencing of peritoneal  
29 carcinomatosis (PC) from 20 patients with advanced gastric adenocarcinoma (GAC), constructed  
30 a transcriptome map of 45,048 PC cells, determined the cell-of-origin of each tumor cell, and  
31 incisively explored ITH of PC tumor cells at single-cell resolution. The links between cell-of-  
32 origin and ITH was illustrated at transcriptomic, genotypic, molecular, and phenotypic levels.  
33 This study characterized the origins of PC tumor cells that populate and thrive in the peritoneal  
34 cavity, uncovered the diversity in tumor cell-of-origins and defined it as a key determinant of  
35 ITH. Furthermore, cell-of-origin-based analysis classified PC into two cellular subtypes that  
36 were prognostic independent of clinical variables, and a 12-gene prognostic signature was then  
37 derived and validated in multiple large-scale GAC cohorts. The prognostic signature appears  
38 fundamental to GAC carcinogenesis/progression and could be practical for patient stratification.

39

40 **KEY WORDS:**

41 Gastric Adenocarcinoma (GAC);  
42 Peritoneal Carcinomatosis (PC);  
43 Peritoneal Metastasis;  
44 Intra-tumor Heterogeneity (ITH);  
45 Single Cell RNA Sequencing (scRNA-seq);  
46 Cell of Origin;  
47 Differentially Expressed Genes (DEGs);  
48 Copy Number Variations (CNVs);  
49 Prognostic Signature;

50 **Main:**

51 Gastric adenocarcinoma (GAC) remains a common and lethal disease with a poor prognosis<sup>1</sup>.  
52 Often diagnosed at an advanced stage, GAC is frequently resistant to therapy<sup>2</sup>. A common site of  
53 metastases is the peritoneal cavity (peritoneal carcinomatosis; PC) and there is an unmet need for  
54 improved therapeutic options in advanced GAC patients<sup>3,4</sup>. Patients with PC are highly  
55 symptomatic and can have an overall survival of <6 months. Only a small fraction of patients  
56 benefits, often only transiently, from immune checkpoint inhibitors<sup>5,6</sup> or HER2-directed therapy<sup>7</sup>.  
57 Molecular understanding of advanced GAC is limited. Four genotypes defined by The Cancer  
58 Genome Atlas (TCGA) were based on analysis of primary GACs<sup>8</sup>. The two clinically favorable  
59 subtypes, Epstein-Barr virus-induced and microsatellite instable, are rare in advanced GAC  
60 cohorts<sup>9</sup>. In the clinic, empiricism prevails as patients are not routinely stratified and rational  
61 therapeutic selection is exceedingly limited.

62 It is well recognized that GAC is endowed with extensive inter- and intra-tumoral  
63 heterogeneity (ITH)<sup>8,9</sup>. ITH is fundamental for GAC survival as it confers therapy resistance and  
64 is a major obstacle to improving patient outcome. However, the origins of ITH are poorly  
65 understood. Deeper understanding of the cellular/molecular basis of ITH could influence how  
66 GACs are treated. Single-cell transcriptome sequencing (scRNA-seq) has emerged as a robust  
67 and unbiased tool to assess cellular and transcriptomic ITH<sup>10</sup>.

68 In this study, we incisively explored ITH of PC tumor cells at the single-cell resolution to  
69 obtain an improved understanding of the origins of tumor cells that populate and thrive in the  
70 peritoneal cavity. We constructed a transcriptome map of 45,048 PC cells, identified and  
71 characterized the cell-of-origins of PC tumor cell. This study, uncovers the diversity in tumor  
72 cell-of-origins and defines it as a key determinant of ITH in GAC. The links between cell-of-

73 origin and ITH was illustrated at the transcriptomic, genotypic, cell-cycle state, molecular  
74 pathways, and phenotypic levels. Finally, the cell-of-origin-based analysis of PC tumor cells led  
75 to a 12-gene fundamental signature, which although derived from PC cells, retained its  
76 prognostic significance when applied to several independent localized and advanced large-scale  
77 GAC cohorts. These results provide an avenue for patient stratification and novel target  
78 discovery for future therapeutic exploitation.

79

### 80 **A single-cell transcriptome map of PC**

81 scRNA-seq was performed on freshly isolated ascites cells from 20 GAC patients (**Fig. 1a,**  
82 **Table S1**). Following quality filtering, we acquired high-quality data for 45,048 cells. A  
83 multistep approach was applied to identify PC malignant cells and define immune cell types (see  
84 **Methods**). We captured 6 main cell types: tumor cells, fibroblasts, and 4 immune cell types,  
85 each defined by unique signature genes (**Extended Data Fig. 1**). The immune cells from  
86 different patients clustered by cell type, whereas PC malignant cells clustered distinctly by  
87 patient. But it was evident that tumor cells from the short-term survivors clustered closely in t-  
88 SNE plot (t-distributed stochastic neighbor embedding, **Extended Data Fig. 2**). In this study, we  
89 have focused on PC tumor cells (n=31,131). Five patients with too few tumor cells (<50) were  
90 excluded from subsequent analysis. To profile the transcriptomic landscape of PC tumor cells,  
91 unsupervised cell clustering was carried out, which uncovered 14 unique cell clusters, with  
92 differentially expressed genes (DEGs) specifically marking each cell cluster (**Fig. 1b, Extended**  
93 **Data Fig. 3**). It is worth mentioning that tumor cells from patient IP-070 formed two separated  
94 clusters (2 and 12). These results indicated a high degree of inter- and intra-tumoral  
95 heterogeneities in PC malignant cells.

96

## 97 **The cell-of-origin of malignant cells within the peritoneal cavity**

98 To map each individual PC tumor cell and to determine its cell of origin (genotype/phenotype),  
99 we performed cell-of-origin analysis by mapping scRNA-seq data to Human Cell Landscape  
100 (<http://bis.zju.edu.cn/HCL/>), a scRNA-seq database that comprises >630k cells covering 1,393  
101 cell types/states from 44 human organs/tissues (see **Methods**). Our analysis revealed a high  
102 degree of cellular heterogeneity in PC (the diversity of origins of tumor cells that comprised the  
103 tumor). Intriguingly, although all cases in this study were clinically diagnosed as PC from GAC,  
104 our transcriptome-based cell-of-origin analysis revealed 14 defined cell types originated from 7  
105 organs (**Fig. 1c, Table S2**). Only 60% of mapped PC tumor cells transcriptomically resembled  
106 cells of stomach origin, including pit cells (41%), mucosal cells (19%), and chief cells (0.4%).  
107 However, the expression features of a subset of PC tumor cells (23%) closely resembled cells of  
108 other GI (gastrointestinal) organs, including colon (15%), pancreas (3%), rectum (2%),  
109 duodenum (1%), and gallbladder (1%). For case IP-070, our analysis suggested that no PC tumor  
110 cells were of GI origin, instead, the cells transcriptomically resembled breast luminal epithelial  
111 cells (**Extended Data Fig. 4**). After a comprehensive review of the patient's clinical record, we  
112 noted that this case was misdiagnosed and treated as GAC at an outside hospital but it was breast  
113 cancer that metastasized to the stomach resulting in PC subsequently. This vignette reflected the  
114 accuracy of our cell-of-origin analysis.

115

## 116 **The diversity in tumor cell origins is a key determinant of PC transcriptomic ITH with** 117 **prognostic value**

118 To further study ITH and examine its relationship with tumor cell origins, we performed  
119 unsupervised clustering of PC tumor cells separately for each individual case based on  
120 transcriptomic profiles and then projected the cell-of-origin annotation on generated tSNE plots.

121 The representative results are shown in **Fig. 1d**. We observed a separation (different  
122 transcriptomic profiles) of the cells showing a gastric lineage from the cells demonstrating a  
123 colonic lineage (IP-067, IP-158, IP-010) in tSNE plots. Notably, the stomach pit cells also  
124 clustered distinctly from stomach mucosal cells (IP-009). DEGs analysis revealed gene  
125 expression signatures specific to each cell population (**Fig. 1e**). Our results demonstrated that PC  
126 tumor cells with different cell origins are transcriptomically distinct and suggested that the  
127 diversity in tumor cell origins is likely a determinant of ITH. For two cases (IP-158 and IP-010)  
128 with mixed stomach/colon cell lineages, we were able to retrieve the histology images of the  
129 corresponding GAC primary tumors and confirmed tumors arose in the setting of gastric  
130 intestinal metaplasia, characterized by the presence of well-formed goblet cells in gastric mucosa  
131 (**Fig. 1f**). This finding is intriguing given the associated analysis showing a mixed cellular  
132 population of both gastric and colorectal lineages.

133 Based on the cellular compositions, we classified PC into two main groups: the Gastric-  
134 dominant (dominated by gastric cell lineages) and the GI-mixed (with mixed gastric and  
135 colorectal cell lineages) (**Fig. 1c**). We further investigated the correlation of cell-of-origin-based  
136 classification with clinical/ histopathological variables, and no significant difference was  
137 observed for histopathological features between two groups. Notably, the cell-of-origin based  
138 classification of PC tumor cells showed a strong correlation with patient survival (**Fig. 1g**): all 6  
139 cases with a GI-mixed phenotype were long survivors, whereas 6/8 cases with a Gastric-  
140 dominant phenotype were short survivors (Fisher's Exact test,  $P = 0.0097$ , **Extended Data Fig.**  
141 **5**). Currently, a validated and practical molecular signature for PC is lacking. These results  
142 suggested that, the cell-of-origin features of PC tumor cells could prognosticate patient survival.

143

144 **Tumor cell proliferative property strongly correlated with tumor cell-of-origin**

145 To study the ITH of tumor cell proliferative property and examine its link to tumor cell-of-origin,  
146 we computationally assigned a cell cycle stage to each individual cell based on expression profile  
147 of cell-cycle related signature genes<sup>11</sup> (see **Methods**). Our analysis suggested that 51% of PC  
148 tumor cells are cycling, either in G2M or S phase (**Fig. 2a, Table S3**). Interestingly, tumor cell  
149 proliferative property strongly correlated with tumor cell origins (**Fig. 2b**). The stomach pit cells  
150 were highly proliferative, with vast majority of cells in G2M/S phase, while the stomach mucosal  
151 cells and cells of colorectal origins were quiescent. Consistently, some key cell-cycle regulatory  
152 genes were differentially expressed across tumor cell populations with different origins and  
153 associated with patient survival (**Fig. 2c**).

154

### 155 **The Genotypic ITH of PC tumor cells links to cell-of-origin**

156 We next investigated the genotypic ITH of PC tumor cells and examined its association with  
157 tumor cell origins. Single-cell copy number variations (CNVs) were inferred from scRNA-seq  
158 data<sup>10,12,13</sup> (see **Methods**). The inferred CNVs showed considerable patient-to-patient and cell-to-  
159 cell variations (**Fig. 3**), indicating a significant genotypic heterogeneity among PC tumor cells.  
160 For each individual patient, we further investigated copy number subclonal structures of PC  
161 tumor cells using unsupervised hierarchical clustering. Intriguingly, the pattern of CNV  
162 subclonal structures aligned well with tumor cell origins (**Fig. 3a**). For example, for case IP-067,  
163 PC tumor cells clustered into 3 major subpopulations with distinct CNV profiles: the largest  
164 subpopulation was mainly comprised of cells of colon lineage and distinguished by number of  
165 CNVs from the smallest subpopulation that was purely comprised of cells of stomach lineage, a  
166 subpopulation in medium size was a mixture of cells from both lineages and the cells shared  
167 similar CNV profiles. Similarly, 3 populations were identified in IP-009 that was gastric-

168 dominant (**Fig. 3a**, bottom), and the smallest subpopulation (comprised of stomach pit cells)  
169 showed additional CNVs that were not present in the subpopulation that was mainly comprised  
170 of stomach mucosal cells.

171 In addition, we analyzed CNVs from all cases together and discovered 17q amplification as a  
172 unique event that was highly abundant in tumors cells with stomach origin and only present in  
173 cells from short survivors (**Fig. 3b**). By integrating genotypic and transcriptomic profiles, we  
174 identified a list of upregulated genes on 17q in tumor cells with evident 17q amplification  
175 (compared to the rest of cells without amplified 17q) (**Fig. 3c, Table S4**). Some of these  
176 upregulated genes involved in key signaling pathways (PI3K/AKT/mTOR, mTORC1, MYC),  
177 are potential therapeutic targets (*NOTCH1*, *GRB2*, *PSMB3*) with a number of compounds being  
178 screened as active<sup>14</sup> (**Table S5**), and associated with patient survival (**Fig. 3d**). Our results  
179 demonstrated that the genotypic ITH in PC tumor cells associated with tumor cell origin and  
180 patient survival.

181

### 182 **Single-cell molecular signaling heterogeneity correlated with tumor cell-of-origin**

183 To examine the molecular consequences of transcriptomic and genotypic alterations described  
184 above and to better understand the biological programs associated with cell-of-origin and patient  
185 survival, we performed integrative analysis of >900 molecular signaling pathways. Among them,  
186 80 pathways were differentially expressed across tumor cell origins (**Fig. 4a**), and of these, 37  
187 were also strongly associated with patient survival (**Fig. 4b, Extended Data Fig. 6**). These  
188 pathways were categorized into 5 major classes based on their biological functions: oncogenic  
189 signaling, cell cycle, DNA repair, metabolism, and immune signaling (**Fig. 4c**). Pathway  
190 interactions analysis revealed that these biological processes are functionally connected.



191 Pathways that were significantly enriched in tumor cells with gastric lineage and associated  
192 with shorter survival included cell cycle, DNA repair, PI3K/AKT/mTOR, mTORC1, Wnt, NFκB,  
193 and metabolic reprogramming, which are predominantly oncogenically encoded. In contrast,  
194 pathways that were enriched in tumor cells with colon lineage and associated with longer  
195 survival included defensins, IL-7 signaling, complement cascade, IL6/JAK/STAT3 signaling,  
196 and interferon alpha/gamma, which are exclusively immune related (**Figs. 4a-b**). These results  
197 indicated that different biological processes might have been activated in tumor cells with  
198 different origins and contributed to their distinct molecular consequences and patient survival.

199

#### 200 **Generation and validation of a cell-of-origin based 12-gene prognostic signature**

201 Based on cell-of-origin analysis, a 12-gene signature was derived (**Figs. 5a-b, Methods**). We  
202 first validated this signature in an independent, advanced GAC cohort (n=45) using bulk RNA-  
203 seq data. This signature demonstrated a great power to prognosticate patient survival and  
204 consistently, patients with a Gastric-dominant molecular feature in their PC cells survived  
205 significantly shorter (7.8 vs. 24.5 month) than those with a GI-mixed feature (**Fig. 5c**).  
206 Multivariable Cox regression analysis showed that this signature is a strong prognosticator of  
207 short survival and it outperformed all clinical variables and was independent of  
208 clinical/histopathological features (**Extended Data Fig. 7**).

209 We next evaluated its prognostic significance in 5 other large-scale localized GAC  
210 cohorts<sup>13,15-17</sup>, totaling 1,425 patients. Notably, although this signature was derived from an  
211 advanced GAC cohort, it retained its prognostic prowess in these validation cohorts of localized  
212 GACs and demonstrated a robust power in prognosticating survival (**Fig. 5c**). Intriguingly, this  
213 signature is independent of other molecular and clinical subtypes (**Extended Data Fig. 8**) and it

214 correlated strongly with the risk of local recurrence/distal metastases among the TCGA<sup>8</sup> and  
215 Cristescu cohorts<sup>17</sup>, where expression and outcome data are both available (**Fig. 5d, Extended**  
216 **Data Fig. 9**). These results further highlighted the value of this prognostic signature and its  
217 robustness in prognosticating patient survival.

218

## 219 **Discussion**

220 The progress against GAC has lagged behind other GI tumor types. Therapy resistance and the  
221 lack of rational therapeutic targets against GAC represent major obstacles in improving survival  
222 of advanced GAC patients<sup>18</sup>. It is widely appreciated that ITH is a fundamental property of  
223 cancer contributing to therapeutic failure, development of distant metastases,<sup>19</sup> and hindrance to  
224 biomarker/target discoveries<sup>20</sup>. Recent studies of localized and advanced GACs identified  
225 multiple molecular subtypes and revealed a high degree of ITH that are associated with poor  
226 clinical outcomes<sup>9,21,22</sup>. Therefore, deeper dissection of ITH is critical for understanding the  
227 underlying mechanisms driving poor prognosis of GAC and for overcoming therapeutic  
228 resistance. In this study, we dissected, at unprecedented resolution, the cellular and  
229 transcriptomic ITH of PC tumor cells using the cutting-edge scRNA-seq technology, in  
230 combination with integrative computational analyses.

231 A key finding of this study is that diversity of cell-of-origin appears to mirror and may even  
232 dictate inherent ITH of PC tumor cells at multiple molecular levels. The origin of ITH has been  
233 the subject of discussion, with multiple models being proposed<sup>23,24</sup>. Peritoneal cavity is a unique  
234 microenvironment where tumor cells can be in suspension in the peritoneal fluid as opposed to  
235 localized solid tumor tissues, the ascites cells we have sequenced may be a better representation  
236 of ITH. We discovered several transcriptomically distinct tumor cell populations that could be  
237 distinguished by cell lineage characteristics. We noted that >40% of cases in our discovery

238 cohort had a large number of tumor cells with genotype/phenotype mapping to non-stomach GI  
239 lineages. We documented that ITH defined by cell-of-origin is perpetuated at transcriptomic,  
240 genotypic, cell-cycle state, molecular signaling, and phenotypic levels and strongly associated  
241 with survival. We showed that tumor cell transcriptomic profiles and proliferative property  
242 significantly differed across cells with different origins, so did the molecular signaling,  
243 suggesting that treatment strategies could potentially be tailored to these molecular features. It  
244 would appear that varied biological programs (e.g. genomic/epigenomic) might have been  
245 engaged early in tumor cells resulting in different genotypes/phenotypes and subsequently  
246 contributed to distinct molecular ITH and patient prognosis. In addition, we discovered that 17q  
247 amplification was highly abundant in PC cells of gastric lineage. 17q is a region that harbors  
248 multiple potential therapeutic targets and interestingly, all patients with 17q amplification had a  
249 short survival. Our discovery of the direct link between tumor cell-of-origin and ITH at the  
250 single-cell resolution could be generalized to other cancer types and broaden our understanding  
251 of cancer in general.

252 Most intriguingly, the cell-of-origin-based analysis classified PC tumor cells into two cellular  
253 subtypes that were prognostic independent of histopathological features. Further analyses led us  
254 to discover a 12-gene signature that appears to be fundamental to GAC  
255 carcinogenesis/propagation as it was not only highly prognostic in GAC metastatic validation  
256 cohort but perform just as robustly in several large-scale localized GAC cohorts. Currently, there  
257 is no such signature in clinical use and this signature has a high potential to stratify patients for  
258 more effective therapies as this becomes available.

259

## 260 **METHODS**

### 261 **Patient cohort, clinical characteristics, and sample collection**

262 A total of 20 GAC patients with malignant ascites (peritoneal carcinomatosis, PC) was included  
263 in this study. The detailed clinical and histopathological characteristics are described in the  
264 **Supplementary Table S1**. GACs were staged according to the American Joint Committee on  
265 Cancer Staging Manual (8th edition)<sup>25,26</sup>. PC was confirmed by cytologic examination. This  
266 cohort included 10 long-term survivors and 10 short-term survivors. The long-term survivors  
267 were patients who survived more than 1 year after the diagnosis of PC and the short-term  
268 survivors were patients who passed away within 6 months after the diagnosis of PC. Based on  
269 the Lauren's classification of the primary GAC, all tumors were of diffuse type. Sixteen out of  
270 twenty patients had Signet-ring cell carcinoma. Her 2 positivity was performed but no Her2  
271 positivity was detected in these patients. PC specimens were collected at The University of  
272 Texas MD Anderson Cancer Center (Houston, USA) under an Institutional Review Board (IRB)  
273 approved protocol after obtaining written informed consent from each participant. Patients with  
274 diagnosed GAC-PC with ascites were approached when they required a therapeutic paracentesis.  
275 No other selection criteria were applied. This project was approved by the IRB and is in  
276 accordance with the policy advanced by the Helsinki Declaration of 1964 and later versions. PC  
277 specimens were spun down for 20 minutes at 2,000g and pelleted cells (PC cells) were isolated,  
278 property store at -80 °C and used for scRNA-seq. To minimize batch effects, the samples were  
279 processed together using the same protocol by the same research assistant.

## 280 281 **scRNA-seq library preparation and sequencing**

282  
283 Chromium<sup>TM</sup> Single cell sequencing technology from 10X Genomics was used to perform single  
284 cell separation, cDNA amplification, and library construction following the manufacturer's  
285 guidelines. Briefly, the cellular suspensions were loaded on a 10x Chromium Single Cell  
286 Controller to generate single-cell Gel Bead-in-Emulsions (GEMs). The scRNA-Seq libraries

287 were constructed using the Chromium Single Cell 3' Library & Gel Bead Kit v2 (PN-120237,  
288 10x Genomics). The HS dsDNA Qubit kit was used to determine concentration of both the  
289 cDNA and libraries. The HS DNA Bioanalyzer was used for quality track purpose and size  
290 determination for cDNA and lower concentrated libraries. Sample libraries were normalized to  
291 7.5 nM and equal volumes added of each library for pooling. The concentration of the library  
292 pool was determined using Library Quantification qPCR kit (KAPA Biosystems) prior to  
293 sequencing. The barcoded library at the concentration of 275 pM was sequenced on the  
294 NovaSeq6000 (Illumina, San Diego, CA), S2 flow cell (100 cycle kit) using a 26 X 91 run  
295 format with 8 bp index (read 1). To minimize batch effects, all sequencing was processed  
296 together as a single batch. The libraries were constructed using the same version of reagent kits  
297 following the same protocols and the libraries were sequenced on the same flow cell and  
298 analyzed together.

299

### 300 **scRNA-seq data processing and analysis**

301 *Raw sequencing data processing, QC, data filtering, and normalization:* The raw single cell  
302 RNA sequencing data were pre-processed (demultiplex cellular barcodes, read alignment, and  
303 generation of gene count matrix) using Cell Ranger Single Cell Software Suite provided by 10x  
304 Genomics. Detailed QC metrics were generated and evaluated. Genes detected in <3 cells and  
305 cells where < 200 genes had nonzero counts were filtered out and excluded from subsequent  
306 analysis. Low quality cells where >15% of the read counts derived from the mitochondrial  
307 genome were also discarded. After applying these QC criteria, 45,048 single cells and 23,057  
308 genes in total remained and were included in subsequent downstream analysis. Possible batch  
309 effects were evaluated using principal component analysis (PCA). In this study, all sequencing

310 libraries were constructed using the same version of reagent kits following the same protocols  
311 and the libraries were sequenced on the same illumine platform. Therefore, no significant batch  
312 effects were observed. Library size normalization was performed in Seurat<sup>27</sup> on the filtered gene-  
313 cell matrix to obtain the normalized UMI count as previously described<sup>28</sup>.

314

315 ***Unsupervised cell clustering and dimensionality reduction:*** Seurat<sup>27</sup> was applied to the  
316 normalized gene-cell matrix to identify highly variable genes for unsupervised cell clustering. To  
317 identify highly variable genes, the *MeanVarPlot* method in the Seurat<sup>27</sup> package was used to  
318 establish the mean–variance relationship of the normalized counts of each gene across cells. We  
319 then chose genes whose log-mean was between 0.0125 and 3 and whose dispersion was above  
320 0.5, resulting in 3,018 highly variable genes. The elbow plot was generated with the  
321 *PCElbowPlot* function of Seurat<sup>27</sup> and based on which, the number of significant principal  
322 components (PCs) were determined. Different resolution parameters for unsupervised clustering  
323 were then examined in order to determine the optimal number of clusters. For this study, the first  
324 10 PCs and the highly variable genes identified by Seurat<sup>27</sup> were used for unsupervised  
325 clustering with a resolution set to 0.6, yielding a total of 20 cell clusters. The t-distributed  
326 stochastic neighbor embedding (t-SNE) method was used for dimensionality reduction and 2-D  
327 visualization of the single cell clusters.

328

329 ***Determination of major cell types and cell states:*** To define the major cell type of each single  
330 cell that mapped to the tSNE plot, feature plots were firstly generated for a suggested set of  
331 canonical immune and stromal cell marker genes<sup>29,30</sup>. Enrichment of these markers in certain  
332 clusters was considered a strong indication of the clusters representing the corresponding cell

333 types. In addition, differentially expressed genes (DEGs) were identified for each cell cluster  
334 using the *FindAllMarkers* analysis in the Seurat<sup>27</sup> package, followed by a manual review process.  
335 The two approaches are combined to infer major cell types for each cell cluster according to the  
336 enrichment of marker genes and top-ranked differentially expressed genes in each cell cluster, as  
337 previously described<sup>30</sup>.

338

339 ***Infer large copy number variations, distinguish tumor cells:*** InferCNV was applied to infer the  
340 large-scale copy number variation (CNVs) from scRNA-seq data (inferCNV of the Trinity  
341 CTAT Project; <https://github.com/broadinstitute/inferCNV>) and the monocytes from this dataset  
342 were used as the control for CNVs calling. Initial CNVs were estimated by sorting the analyzed  
343 genes by their chromosomal locations and applying a moving average to the relative expression  
344 values, with a sliding window of 100 genes within each chromosome, as previously  
345 described<sup>10,13</sup>. Malignant cells were distinguished from normal cells based on genomic CNVs,  
346 inferred aneuploidy status, cluster distribution of the cells, and marker genes expression.

347

348 ***Cell of origin analysis:*** The cell of origin was assigned by cell type mapping R package  
349 scHCL(<https://github.com/ggijlab/scHCL>) by mapping our transcriptomic data to scHCL (a  
350 scRNA-seq database that comprises >630K single cells covering 1,393 cell types/states from 44  
351 human organ and tissue types) and identifying the best match (Spearman's rank-order correlation)  
352 for each cell.

353

354 ***Inferring cell cycle stage, hierarchical clustering, differentially expressed genes (DEGs), and***  
355 ***pathway enrichment analysis:*** The cell cycle stage was computationally assigned for each

356 individual cell by the function *CellCycleScoring* that is implemented in Seurat<sup>27</sup>. Cell cycle stage  
357 was inferred based on expression profile of the cell cycle related signature genes, as previously  
358 described<sup>11</sup>. Hierarchical clustering was performed for each cell type using the Ward's minimum  
359 variance method. Differentially expressed genes (DEGs) were identified for each cluster using  
360 the *FindMarkers* function of in Seurat R package<sup>27</sup> and DEG list was filtered with the following  
361 criteria: the gene should expressed in 20% or more cells in the more abundant group; expression  
362 fold change >1.5; and FDR q-value <0.05. Heat map was then generated using the *heatmap*  
363 function in pheatmap R package for filtered DEGs. For pathway analysis, we applied single-  
364 sample GSVA (ssGSVA) to determine the molecular phenotypes of single cells using scRNA-  
365 seq expression data. The curated gene sets (including Hallmark, KEGG, REACTOME gene sets,  
366 n=910) were downloaded from the Molecular Signature Database (MSigDB,  
367 <http://software.broadinstitute.org/gsea/msigdb/index.jsp>), and pathway scores were calculated for  
368 each cell using *gsva* function in GSVA software package<sup>31</sup>. Pathway enrichment analysis was  
369 done with the limma R software package. Significant signaling pathways were identified with a  
370 FDR q-value < 0.01.

371

## 372 **Datasets**

373 In addition to the scRNA-seq dataset generated internally for this GAC PC cohort, we included  
374 the bulk mRNA-seq data generated on an independent GAC PC cohort from our recent study<sup>9</sup> to  
375 validate the 12-gene prognostic signature. Moreover, we downloaded the bulk mRNA-seq  
376 expression data (normalized) generated by The Cancer Genome Atlas (TCGA) on primary  
377 stomach adenocarcinoma from NCI Cancer Genomic Data Commons (NCI-GDC:  
378 <https://gdc.cancer.gov>). The mRNA-seq expression data was processed and normalized by the



379 NCI-GDC bioinformatics team using their transcriptome analysis pipeline and we downloaded  
380 the normalized expression data. The clinical annotation of TCGA patients were downloaded  
381 from a recent PanCanAtlas study<sup>32</sup>. Furthermore, we downloaded 5 large-scale primary GAC  
382 datasets (GSE14208, GSE62254, GSE15459, GSE84437) from the Gene Expression Omnibus  
383 (GEO) database (GEO, <https://www.ncbi.nlm.nih.gov/geo/>) to further evaluate the prognostic  
384 power of our identified 12-gene signature.

385

### 386 **Generation and validation of the 12-gene prognostic signature**

387 To generate a gene expression signature that is clinically applicable, we performed multiple-step  
388 analysis (**Fig. 5a**). First, we compared the gene expression profiles of the cell-of-origin based  
389 classification of two patient groups (gastric-dominant vs. GI-mixed) and identified differentially  
390 expressed genes (DEGs) between the two groups. Only the DEGs that are highly expressed  
391 (normalized UMI count >1) in at least 50% of cells from one of the two groups were taken into  
392 subsequent analysis. We next screened each DEG based on their statistical correlation with  
393 patient survival and only the DEGs showed a significant ( $P < 0.05$ ) (or a clear trend,  $P < 0.15$ )  
394 correlation with patient survival were selected, followed by model testing of all possible multiple  
395 gene combinations. The signature was then extracted and subject to validation with both  
396 internally generated and publicly available datasets. To select the optimal classification threshold  
397 for tumor classification, use the signature score, we tested different possible signature score  
398 values and the threshold value 0 was selected. Tumors with a signature score value >0 were  
399 classified as gastric-dominant, and tumors with a signature score value <0 were classified as GI-  
400 mixed. Higher signature scores correlate with the gastric-dominant phenotype and with worse  
401 prognosis. For the bulk expression datasets, the signature scores were calculated using the

402 normalized gene expression values, taking into consideration of the direction of association (a  
403 positive score is assigned for genes associated with the gastric-dominant subtype and a negative  
404 score is assigned for genes associated with the GI-mixed subtype). The signature scores were  
405 further normalized for subsequent survival analysis.

406

#### 407 **Statistical analysis**

408 In addition to the bioinformatics approaches described above for scRNA-seq data analysis, all  
409 other statistical analysis was performed using statistical software R v3.5.2. Analysis of  
410 differences on a continuous variable (such as gene expression, pathway score) across two groups  
411 (a categorical independent variable, such as gastric-dominant vs. GI-mixed) was determined by  
412 the nonparametric Mann-Whitney U test. The nonparametric Kruskal-Wallis test was applied to  
413 assess the significant difference on a continuous variable by a categorical independent variable  
414 with multiple groups (such as the different tumor cell of origin groups). Survival analysis: For  
415 survival analysis including overall survival (OS), Progression-free interval (PFS), disease-free  
416 survival (DFS), disease-specific survival (DSS), disease-free interval (DFI), and survival time  
417 from peritoneal metastasis, we used the log-rank test to calculate p-values, between groups, and  
418 the Kaplan-Meier method to plot survival curves. For the TCGA dataset, the clinical annotation  
419 and the times calculated for OS, DFS, DSS, DFI were downloaded from the PanCanAtlas study<sup>32</sup>.  
420 For other large-scale primary GAC datasets downloaded from GEO, the relevant clinical data  
421 and OS times were downloaded from their published studies<sup>13,15-17</sup>. The hazard ratios were  
422 calculated using the multivariate Cox proportional hazards model. All statistical significance  
423 testing in this study was two-sided. To control for multiple hypothesis testing, we applied the

424 Benjamini-Hochberg method to correct p values and the false discovery rates (q-values) were  
425 calculated. Results were considered statistically significant at p-value or FDR q-value < 0.05.

426

#### 427 **Data availability**

428 All sequencing data generated during this study will be deposited in the Gene Expression  
429 Omnibus (GEO, <https://www.ncbi.nlm.nih.gov/geo/>). The data can be accessed under the  
430 accession number GSExxxxxx (the submission process is currently ongoing, and the accession  
431 number is going to be updated once it is complete).

432

#### 433 **Acknowledgements**

434 This study was supported in part by the IRG starts-up research funds provided to L.W. by U.T.  
435 MD Anderson Cancer Center (MDACC), the DOD grants: CA150334 and CA162445 to J.A.A.,  
436 and DOD grants: CA160433 and CA170906 to S.S., the generous support from the Caporella,  
437 Dallas, Sultan, Park, Smith, Frazier, Oaks, Vanstekelenberg, Planjery, McNeil, Hyland, and  
438 Cantu families, as well as from the Schecter Private Foundation, Rivercreek Foundation, Kevin  
439 Fund, Myer Fund, Stupid Strong Foundation, Dio Fund, Milrod Fund, and the MDACC  
440 multidisciplinary grant programs. This study was also supported by SMF Core grant CA016672  
441 (SMF). We thank E. J. Thompson, D. P. Pollock from the SMF Core for their excellent technical  
442 assistance. We thank all the patients who participated in this study.

443

#### 444 **Author Contributions**

445 L.W. and J.A. conceived and jointly supervised the study. S.S., K.H., M.P.P., M.Z., G.T., N.S.,  
446 A.A.F.A., B.D.B., and M.B.M. contributed to sample collection and processing, and collection of  
447 patient clinical information. A.J.L., J.S.E., S.R.C. contributed to pathology review. L.W.

448 supervised the bioinformatics data analysis, data integration and interpretation; R.W., contributed  
449 to sequencing data processing, quality check, integrative analyses, and generation of figures and  
450 tables for the manuscript. G.H., S.Z., Y.W., S.Z. assisted with data processing and analysis. L.W.,  
451 J.A., R.W., A.J.L., P.A.F., S.H., G.A.C., and G.P. wrote and revised the manuscript.

452

### 453 **Competing Interest Statement**

454 All authors declare no conflicts of interest.

455

### 456 **REFERENCES**

- 457 1. Bray, F., *et al.* Global cancer statistics 2018: GLOBOCAN estimates of incidence and mortality  
458 worldwide for 36 cancers in 185 countries. *CA Cancer J Clin* **68**, 394-424 (2018).
- 459 2. Ikoma, N., *et al.* Preoperative chemoradiation therapy induces primary-tumor complete response  
460 more frequently than chemotherapy alone in gastric cancer: analyses of the National Cancer  
461 Database 2006-2014 using propensity score matching. *Gastric Cancer* **21**, 1004-1013 (2018).
- 462 3. Mizrak Kaya, D., *et al.* Risk of peritoneal metastases in patients who had negative peritoneal  
463 staging and received therapy for localized gastric adenocarcinoma. *J Surg Oncol* **117**, 678-684  
464 (2018).
- 465 4. Shiozaki, H., *et al.* Prognosis of gastric adenocarcinoma patients with various burdens of  
466 peritoneal metastases. *J Surg Oncol* **113**, 29-35 (2016).
- 467 5. Chen, C., *et al.* Efficacy and safety of immune checkpoint inhibitors in advanced gastric or  
468 gastroesophageal junction cancer: a systematic review and meta-analysis. *Oncoimmunology* **8**,  
469 e1581547 (2019).
- 470 6. Taieb, J., *et al.* Evolution of checkpoint inhibitors for the treatment of metastatic gastric cancers:  
471 Current status and future perspectives. *Cancer Treat Rev* **66**, 104-113 (2018).

- 472 7. Bartley, A.N., *et al.* HER2 Testing and Clinical Decision Making in Gastroesophageal  
473 Adenocarcinoma: Guideline From the College of American Pathologists, American Society for  
474 Clinical Pathology, and the American Society of Clinical Oncology. *J Clin Oncol* **35**, 446-464  
475 (2017).
- 476 8. Cancer Genome Atlas Research, N. Comprehensive molecular characterization of gastric  
477 adenocarcinoma. *Nature* **513**, 202-209 (2014).
- 478 9. Wang, R., *et al.* Multiplex profiling of peritoneal metastases from gastric adenocarcinoma  
479 identified novel targets and molecular subtypes that predict treatment response. *Gut* (2019).
- 480 10. Tirosh, I., *et al.* Dissecting the multicellular ecosystem of metastatic melanoma by single-cell  
481 RNA-seq. *Science* **352**, 189-196 (2016).
- 482 11. Jerby-Arnon, L., *et al.* A Cancer Cell Program Promotes T Cell Exclusion and Resistance to  
483 Checkpoint Blockade. *Cell* **175**, 984-997 e924 (2018).
- 484 12. Puram, S.V., *et al.* Single-Cell Transcriptomic Analysis of Primary and Metastatic Tumor  
485 Ecosystems in Head and Neck Cancer. *Cell* **171**, 1611-1624 e1624 (2017).
- 486 13. Patel, A.P., *et al.* Single-cell RNA-seq highlights intratumoral heterogeneity in primary  
487 glioblastoma. *Science* **344**, 1396-1401 (2014).
- 488 14. canSAR (an integrated knowledge-base that provides drug-discovery useful predictions):  
489 <https://cansarblack.icr.ac.uk>.
- 490 15. Kim, H.K., *et al.* A gene expression signature of acquired chemoresistance to cisplatin and  
491 fluorouracil combination chemotherapy in gastric cancer patients. *PLoS One* **6**, e16694 (2011).
- 492 16. Ooi, C.H., *et al.* Oncogenic pathway combinations predict clinical prognosis in gastric cancer.  
493 *PLoS Genet* **5**, e1000676 (2009).
- 494 17. Cristescu, R., *et al.* Molecular analysis of gastric cancer identifies subtypes associated with  
495 distinct clinical outcomes. *Nat Med* **21**, 449-456 (2015).
- 496 18. Mizrak Kaya, D., *et al.* Advanced gastric adenocarcinoma: optimizing therapy options. *Expert*  
497 *Rev Clin Pharmacol* **10**, 263-271 (2017).

- 498 19. Dagogo-Jack, I. & Shaw, A.T. Tumour heterogeneity and resistance to cancer therapies. *Nat Rev*  
499 *Clin Oncol* **15**, 81-94 (2018).
- 500 20. Hudler, P. Challenges of deciphering gastric cancer heterogeneity. *World J Gastroenterol* **21**,  
501 10510-10527 (2015).
- 502 21. Gullo, I., Carneiro, F., Oliveira, C. & Almeida, G.M. Heterogeneity in Gastric Cancer: From Pure  
503 Morphology to Molecular Classifications. *Pathobiology* **85**, 50-63 (2018).
- 504 22. Oh, S.C., *et al.* Clinical and genomic landscape of gastric cancer with a mesenchymal phenotype.  
505 *Nat Commun* **9**, 1777 (2018).
- 506 23. Merlo, L.M., Pepper, J.W., Reid, B.J. & Maley, C.C. Cancer as an evolutionary and ecological  
507 process. *Nat Rev Cancer* **6**, 924-935 (2006).
- 508 24. Michor, F. & Polyak, K. The origins and implications of intratumor heterogeneity. *Cancer Prev*  
509 *Res (Phila)* **3**, 1361-1364 (2010).
- 510 25. Amin, M.B., *et al.* AJCC cancer staging manual. 8th ed. *New York: Springer* (2017).
- 511 26. Amin, M.B., *et al.* The Eighth Edition AJCC Cancer Staging Manual: Continuing to build a  
512 bridge from a population-based to a more "personalized" approach to cancer staging. *CA Cancer*  
513 *J Clin* **67**, 93-99 (2017).
- 514 27. Butler, A., Hoffman, P., Smibert, P., Papalexi, E. & Satija, R. Integrating single-cell  
515 transcriptomic data across different conditions, technologies, and species. *Nat Biotechnol* **36**,  
516 411-420 (2018).
- 517 28. Savas, P., *et al.* Single-cell profiling of breast cancer T cells reveals a tissue-resident memory  
518 subset associated with improved prognosis. *Nat Med* **24**, 986-993 (2018).
- 519 29. Lambrechts, D., *et al.* Phenotype molding of stromal cells in the lung tumor microenvironment.  
520 *Nat Med* **24**, 1277-1289 (2018).
- 521 30. Sade-Feldman, M., *et al.* Defining T Cell States Associated with Response to Checkpoint  
522 Immunotherapy in Melanoma. *Cell* **175**, 998-1013 e1020 (2018).

- 523 31. Hanzelmann, S., Castelo, R. & Guinney, J. GSVA: gene set variation analysis for microarray and  
524 RNA-seq data. *BMC Bioinformatics* **14**, 7 (2013).
- 525 32. Liu, J., *et al.* An Integrated TCGA Pan-Cancer Clinical Data Resource to Drive High-Quality  
526 Survival Outcome Analytics. *Cell* **173**, 400-416 e411 (2018).

527

528

## 529 **Figure Legends**

530 **Figure 1. Cell of origin-based classification of gastric peritoneal metastases showed strong**

531 **correlation with patient survival.** This study included 10 short-term survivors and 10 long-term

532 survivors. **a**, (left) The Kaplan-Meier curve demonstrates a dramatic difference in the survival time

533 between two groups of GAC patients; the panels in the middle and right shows a schema of sample

534 collection and scRNA-seq data analysis, respectively. **b**, The tSNE overview of the 31,131 tumor cells

535 (14 cell clusters) that were selected for subsequent analyses in this study. Each dot in the tSNE plot

536 indicates a single cell. Cells are color coded for the tSNE cluster number (left), the corresponding patient

537 origin (middle), and the cell of origin (right). **c**, The cell-of-origin landscape at single-cell resolution

538 showing the origins of PC tumor cells from 15 GAC patients (5 samples were excluded due to less than

539 50 QC-passed tumor cells with defined cell of origins, Table S2). The middle panel shows the origin (row)

540 of tumor cells by patient (column). The size of the circle represents the proportion of tumor cells (of the

541 total QC-passed tumor cells for each individual sample) for each specific cell origin. The circles are color

542 coded by the cell of origin. The annotation track on the left shows a brief description of each defined cell

543 origin. The histogram on the top shows the number of cells accumulated on 14 listed cell origins (plus

544 Other-other unclassified or rare cell types) in each individual sample (patient). The histogram on the right

545 shows the proportion of tumor cells (of the total QC-passed tumor cells for this cohort) for each specific

546 tumor cell origin. The bottom annotation tracks show (from top to bottom): the corresponding patient ID,

547 classification based on patient survival, the presence of intestinal metaplasia in the corresponding primary

548 tumor, and classification based on the composition of cell compartments. **d**, The representative tSNE plot

549 of tumor cells (colored by their cell of origin) for each individual case, and **e**, The scaled expression  
550 values of discriminative genes for each defined tumor cell origin for two representative cases IP-009 and  
551 IP-158. **f**, A representative histology image for IP-010 demonstrating well-formed goblet cells in gastric  
552 mucosa (blue arrow heads). **g**, The correlation of cell or origin-based classification with patient survival.  
553 The survival time was calculated from the diagnosis of peritoneal metastasis (left) and the time of ascites  
554 collection (right), respectively.

555 **Figure 2. The tumor cell transcriptome heterogeneity and cell proliferative properties closely**  
556 **associated with tumor cell origins.** **a**, The tSNE overview of the cell cycle stages (left), the G2M score  
557 (middle), and S score (right) for the 31,131 QC-passed PC tumor cells. **b**, The tSNE plots of 5  
558 representative cases displaying unsupervised clustering of tumor cells according to their transcriptome  
559 profiles and the correlation of cell proliferative property with tumor cell origins. The cells are colored  
560 coded (from top to bottom) by tumor cell-of-origin, cell cycle stage, the quantitative score for G2M phase  
561 and S phase, respectively. The red irregular shapes are used to highlight the highly proliferative cell  
562 cluster of each individual sample. **c**, The violin plots for representative genes that are differentially  
563 expressed between tumor cells with different cell origins (left) and their correlation with patient survival  
564 (right).

565 **Figure 3. DNA copy number variations (CNVs) and genotypic heterogeneity associated with tumor**  
566 **cell origin and patient survival.** **a**, An overview of the genome-wide CNVs for two representative cases  
567 (IP-067, GI-mixed; IP-009, Gastric-dominant) and correlation of the genotypic heterogeneity with the  
568 origins of tumor cells. The circus plots on the left demonstrated unsupervised clustering of tumor cells  
569 with different origin (color coded) for each individual case based on their inferred CNVs. The  
570 unsupervised hierarchical clustering on the right displays a detailed map of the CNVs across 22  
571 chromosomes (labelled on the top) for each individual cell (row), with copy number gains in red and  
572 losses in blue. The dendrogram on the left indicates the clustering structure and the annotation track next  
573 to it shows the defined cell of origin (color coded as in Fig. 1c). **b**, The landscape of inferred CNVs for all



574 31,131 tumor cells. The annotation tracks on the left indicates the corresponding patient ID, survival  
575 status, classification based on cell of origin, and tumor cell origins, respectively. The chromosome  
576 numbers were labelled on the top. The yellow rectangle highlights the 17q copy number gain that was  
577 observed exclusively in cells from the short-term survivors. **c**, The heatmap displays scaled expression  
578 values of genes upregulated in 3 short survivors (sample IDs labelled at the bottom) with evident 17q gain  
579 (annotated on the top track), 1 short-term survivor and 9 long-term survivors without detectable 17q  
580 changes. Biologically important genes were listed on the right, color coded by their related signaling  
581 pathways. **d**, The representative violin plots of 8 genes selected from the Panel **c**.

582 **Figure 4. Molecular pathway based dissection of the transcriptomic heterogeneity and correlation**  
583 **with cell-of-origin and patient survival.** **a**, The transcriptomic heterogeneity of annotated gene sets  
584 including cancer hallmark gene sets (n=50), and other curated gene sets from KEGG (n=186) and  
585 Reactome (n=674) pathway databases. Each column represents a single cell. Only the pathways (row)  
586 that differentially expressed across different tumor cell origins are shown. The tumor cell origin was  
587 annotated at the top track and the pathway names are labelled on the right, color coded by their biological  
588 functions. **b**, The representative violin plots of 6 pathways selected from Panel **a** and Extended Data Fig.  
589 6 that showed significant correlation with patient survival. **c**, The interaction networks of differentially  
590 expressed pathways displayed in the Panel **a**.

591 **Figure 5. Identification and validation of the 12-gene prognostic signature.** **a**, A schema that  
592 describes the bioinformatics flow for generation of the 12-gene signature. **b**, The 12 genes used to  
593 generate this signature and its differential expression between the gastric-dominant and GI-mixed groups.  
594 **c**, The Kaplan–Meier curves demonstrating the predictive power of this signature across 5 validation  
595 cohorts including a second independent cohort of GAC-PC patients (n=45) from MD Anderson Cancer  
596 Center (MDACC), the TCGA primary GAC cohort, and 3 other large-scale primary GAC cohorts. The  
597 source of the dataset, the size of each cohort, log-rank P-value, and the median survival time (in months)  
598 were labeled on each Kaplan–Meier plot. OS, overall survival; DFS, disease-free survival. **d**, The alluvial

599 plots (left) shows the relationship between cell-of-origin defined subtypes (left strip) and the presence of  
600 local recurrence and/or distal metastasis (right strip). The yellow band highlights the significant  
601 enrichment of local recurrence and/or distal metastasis events in tumors with the gastric-dominant  
602 subtype. The violin plot (right) shows a significant difference in the mean signature score in tumors  
603 with/without local recurrence and/or distal metastasis.

604 **Extended Data Figures** (n=9, see the PDF file Extended-Data-Figures).

605 **Supplementary Tables** (n=5, see the PDF file Supplementary Tables\_S1-4, and the Excel files

606 Supplementary Tables\_S5).

607

# Figure 1

**a**

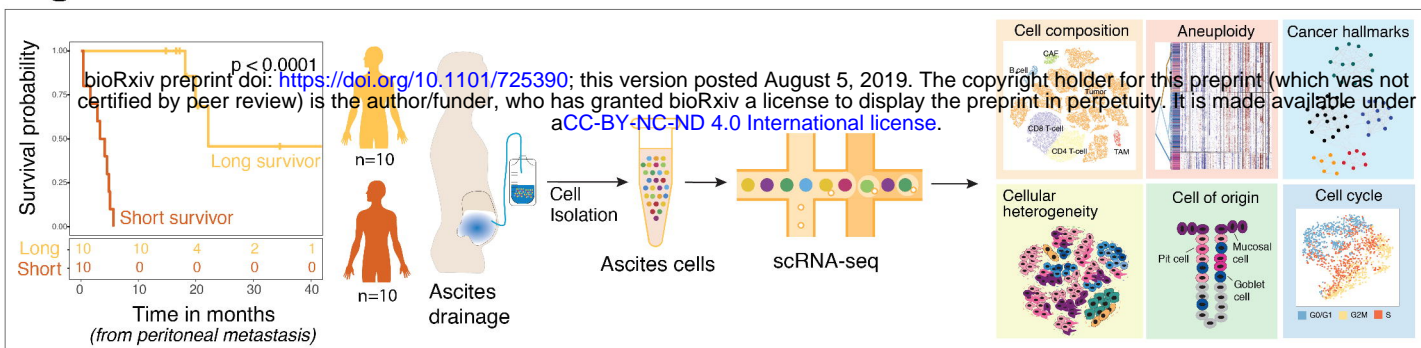

**b**

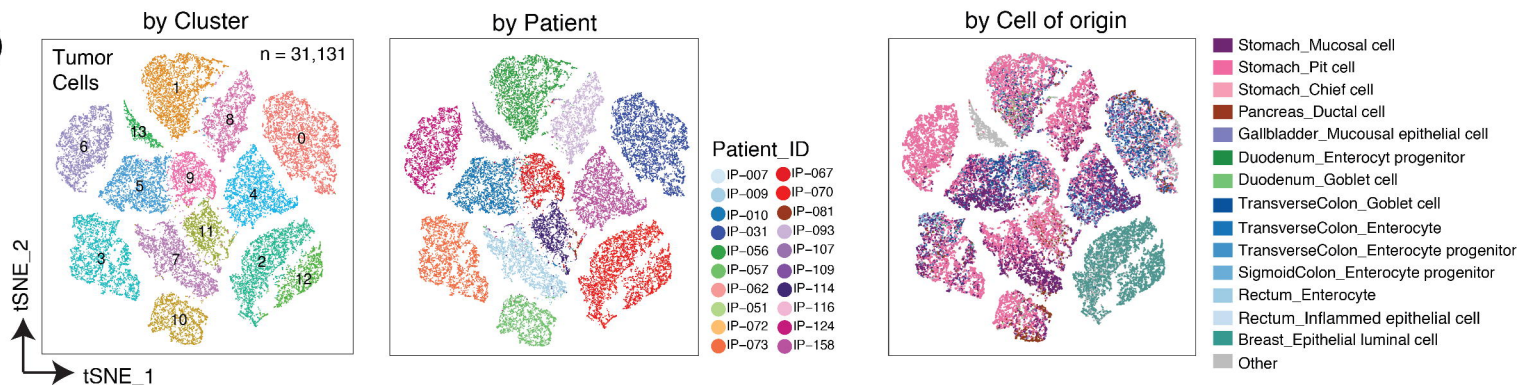

**c**

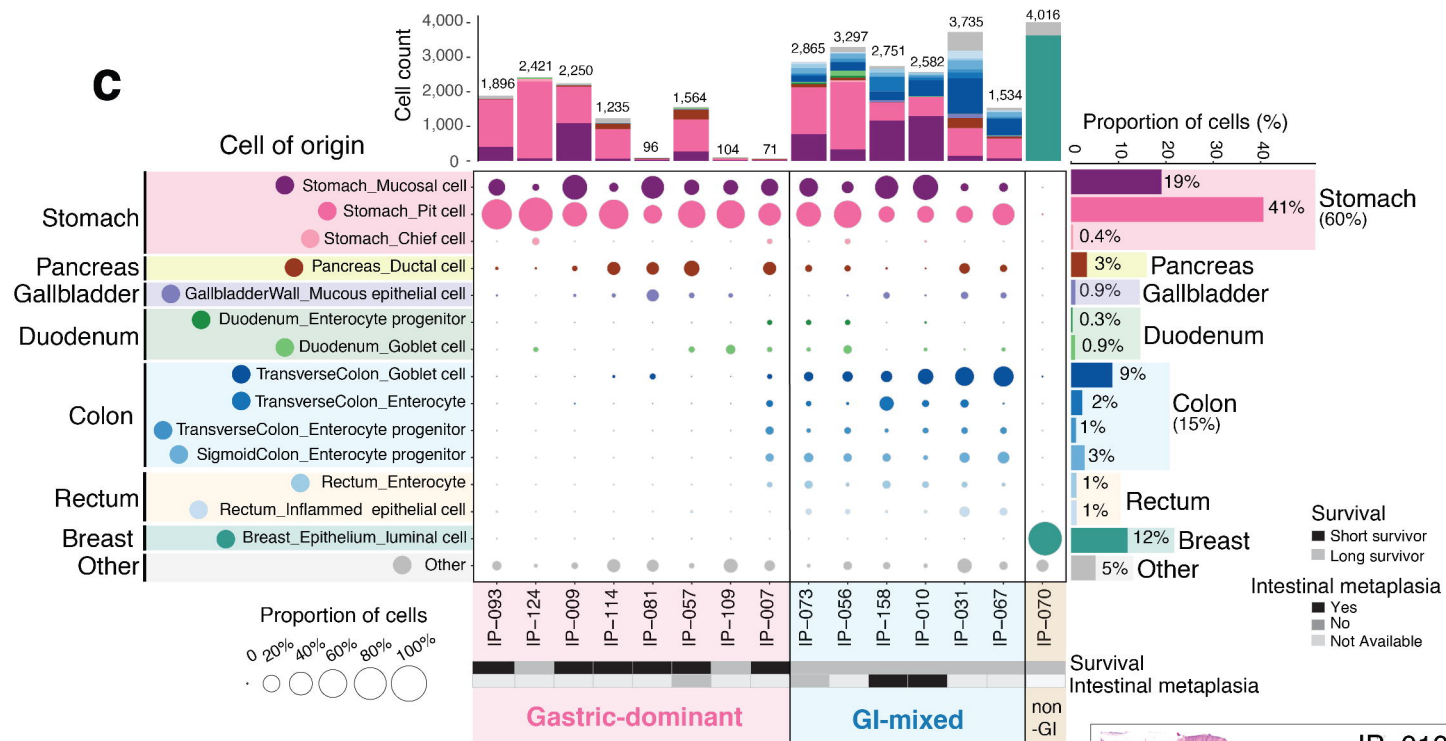

**d**

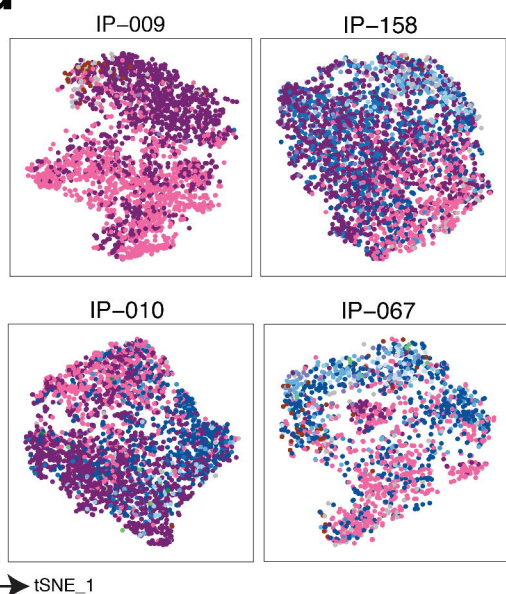

**e**

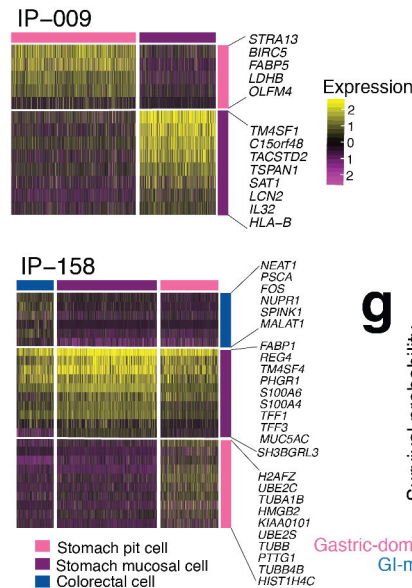

**f**

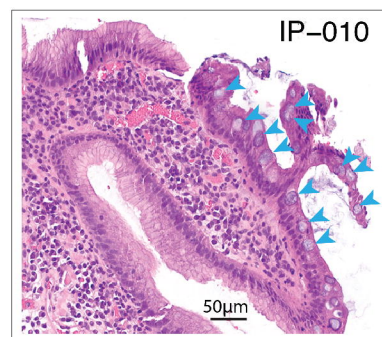

**g**

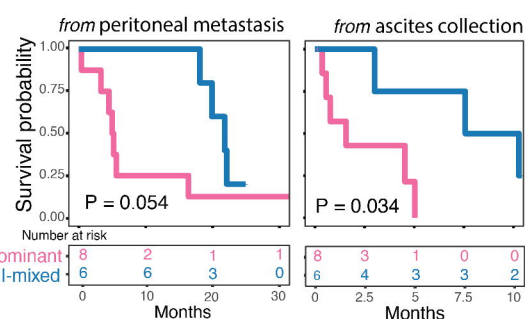

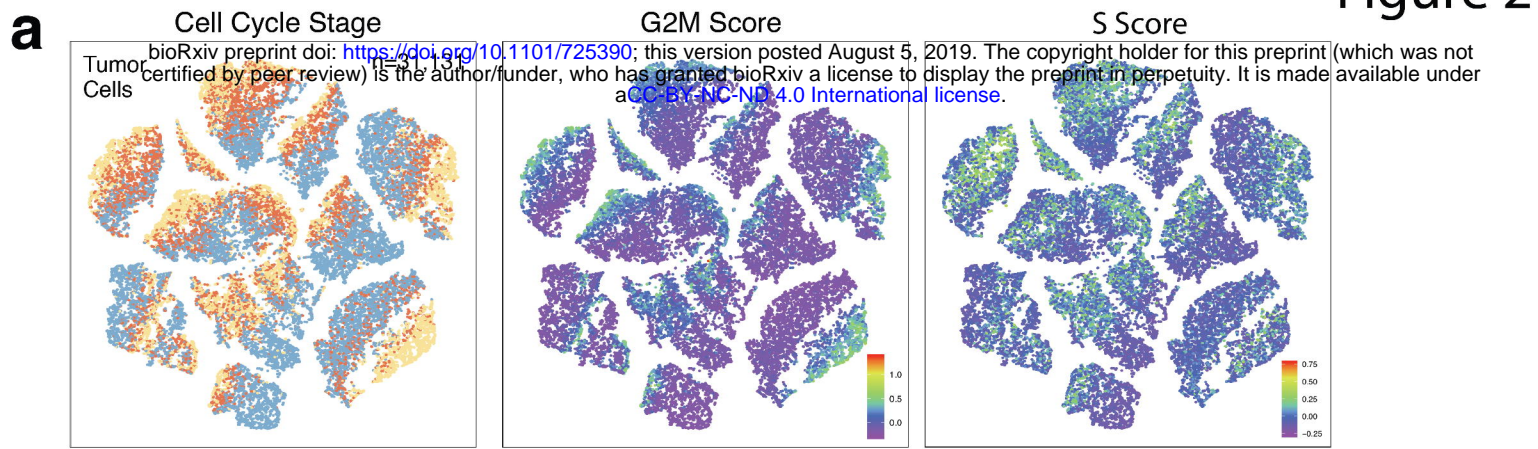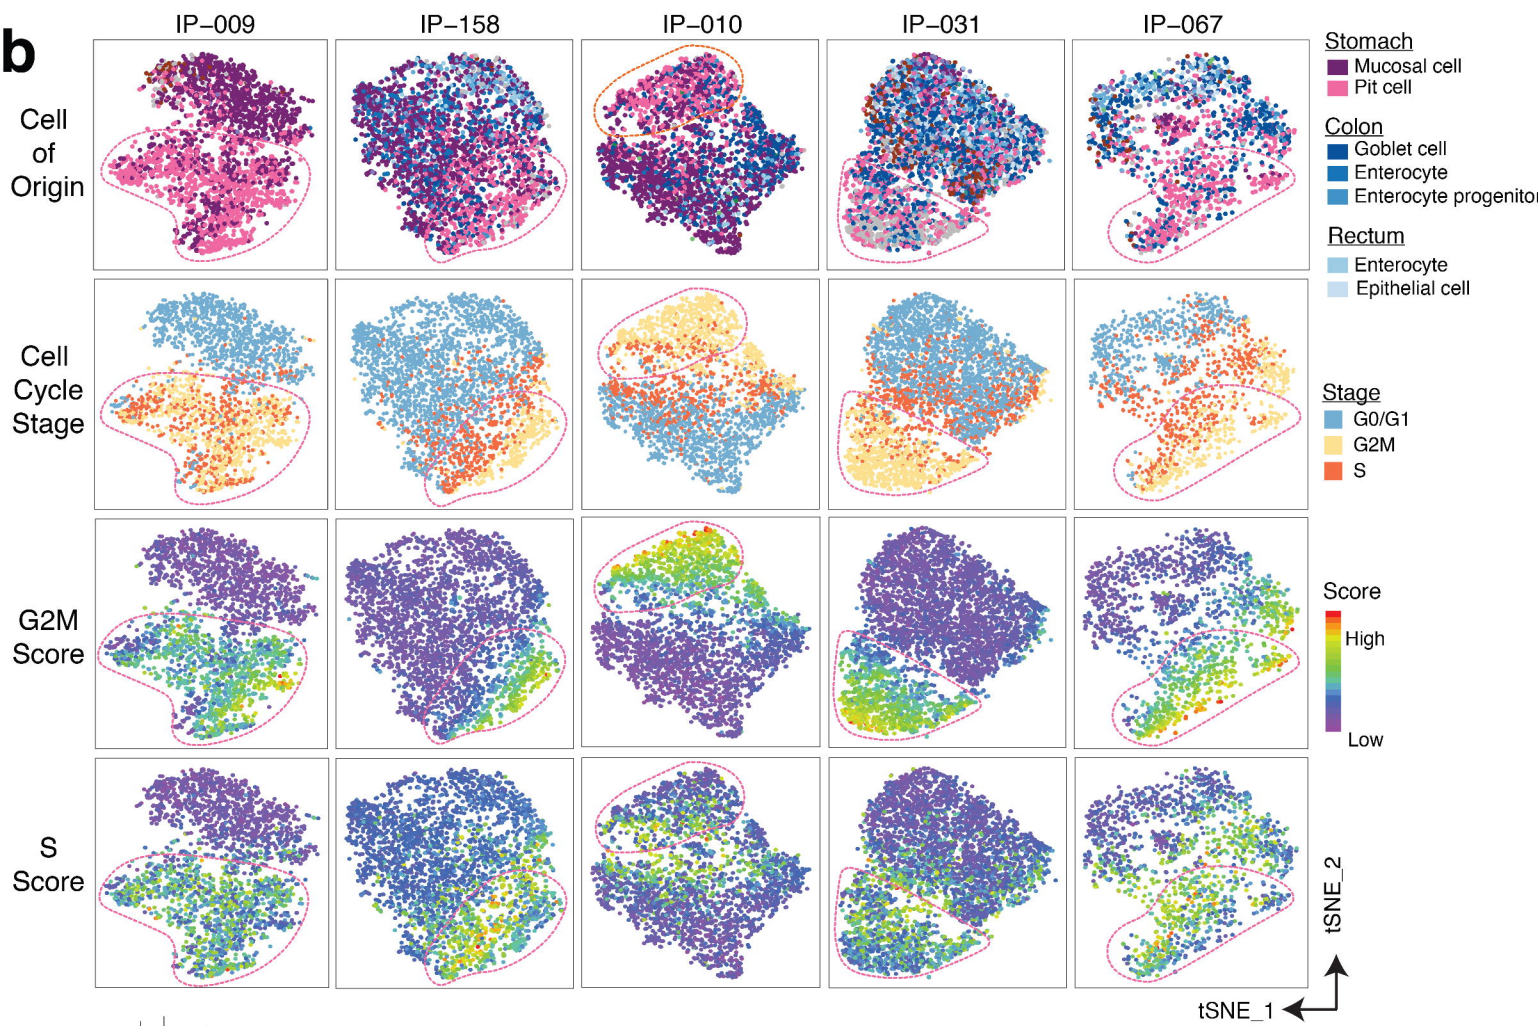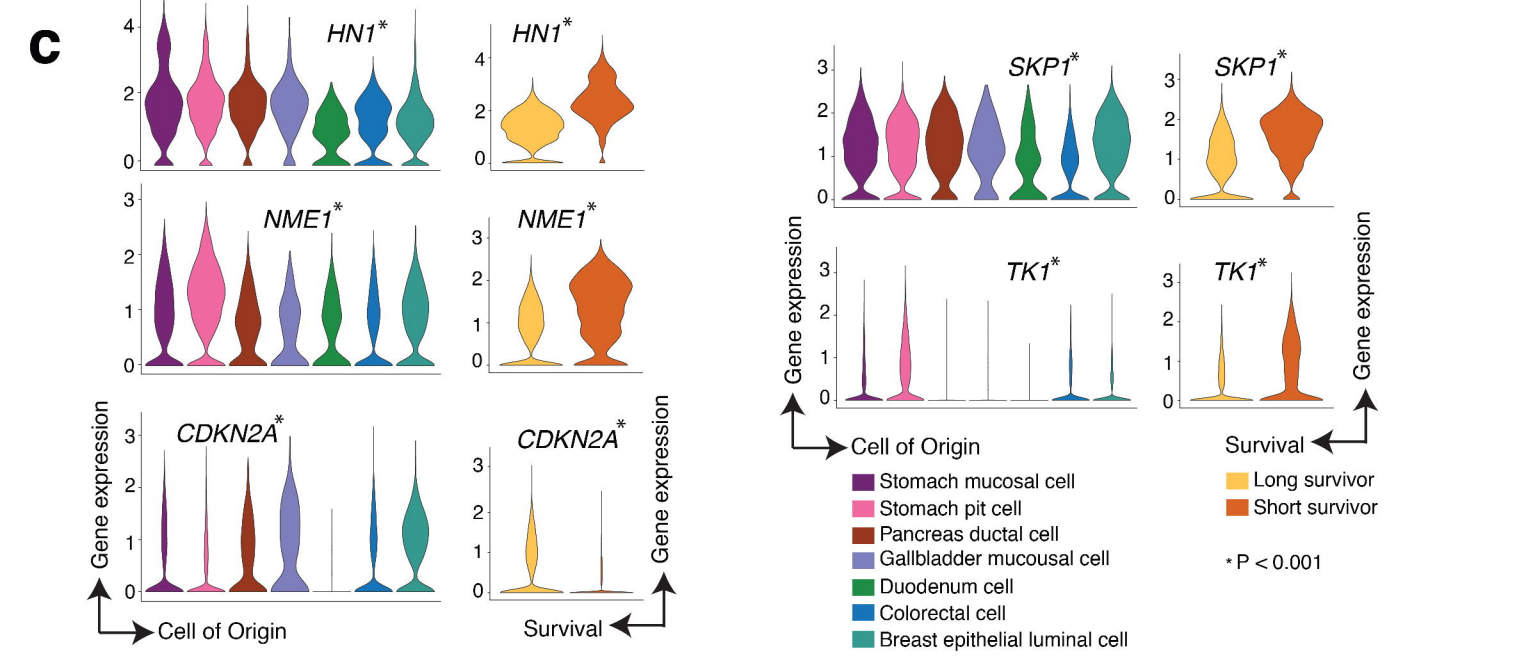

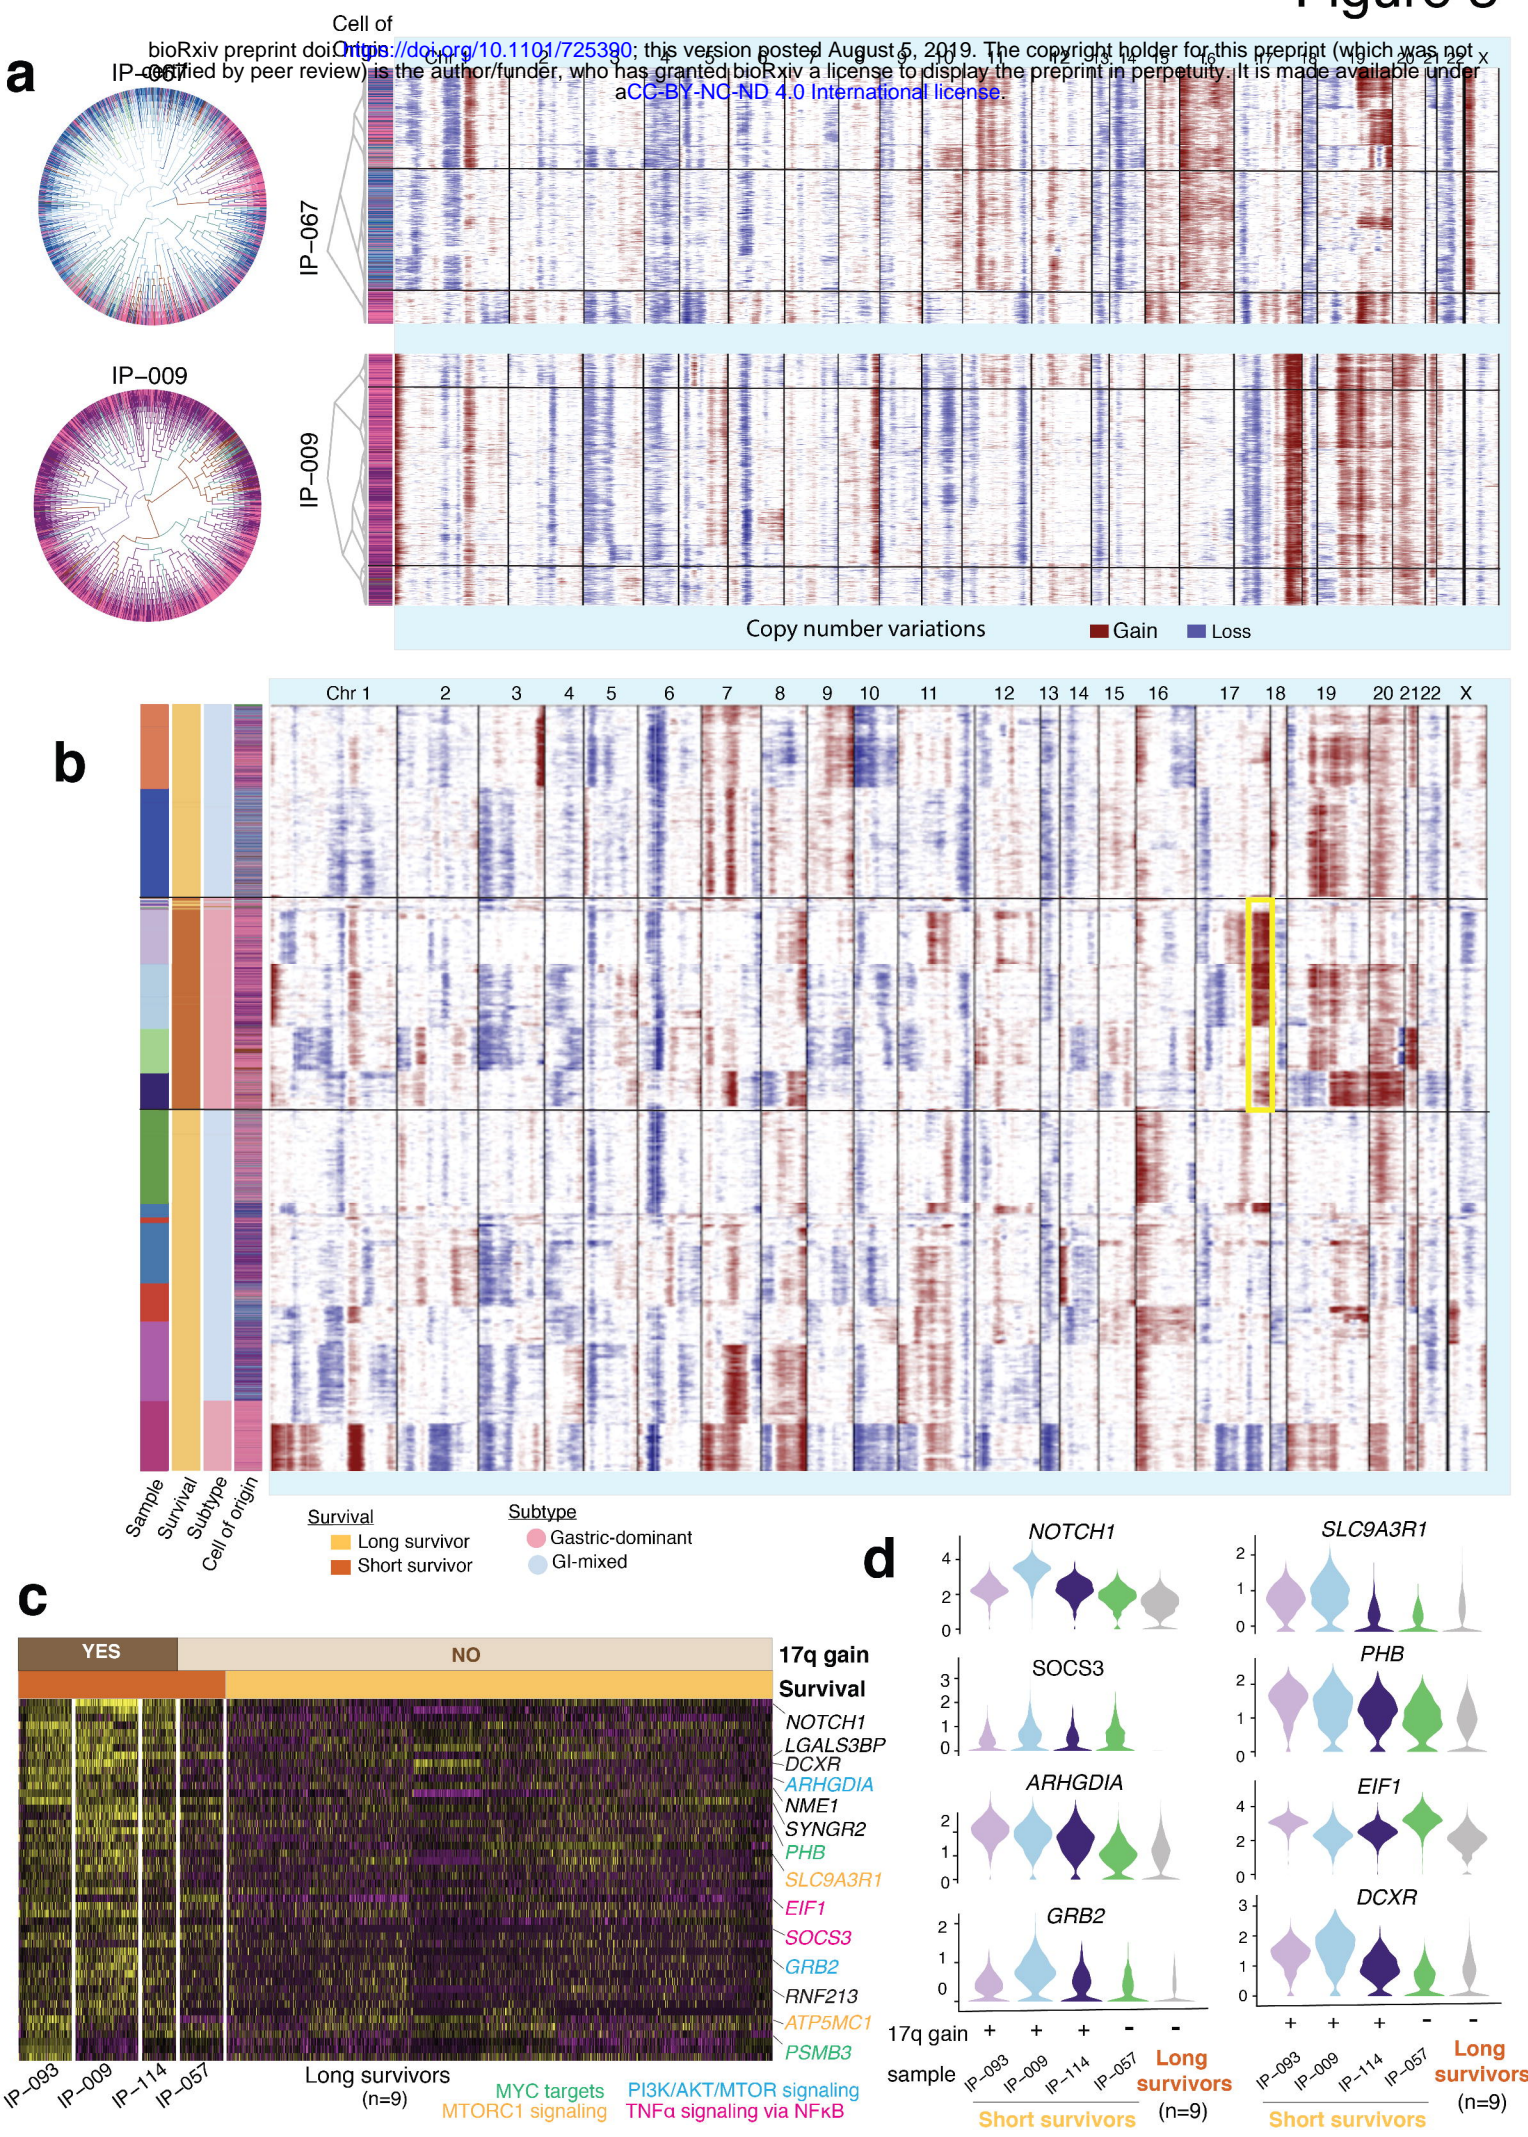

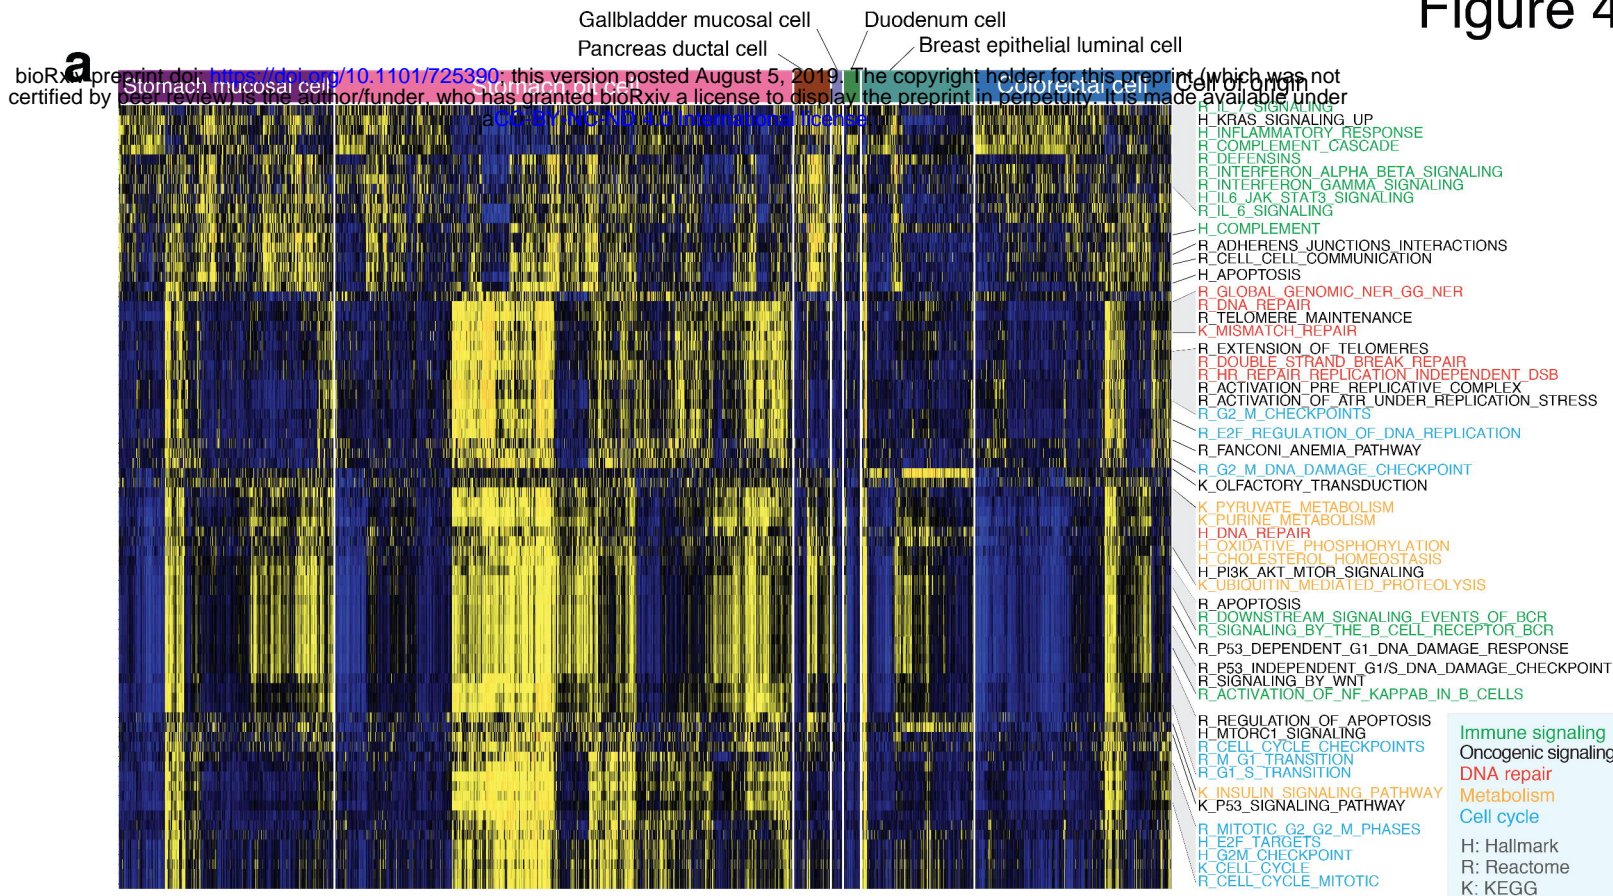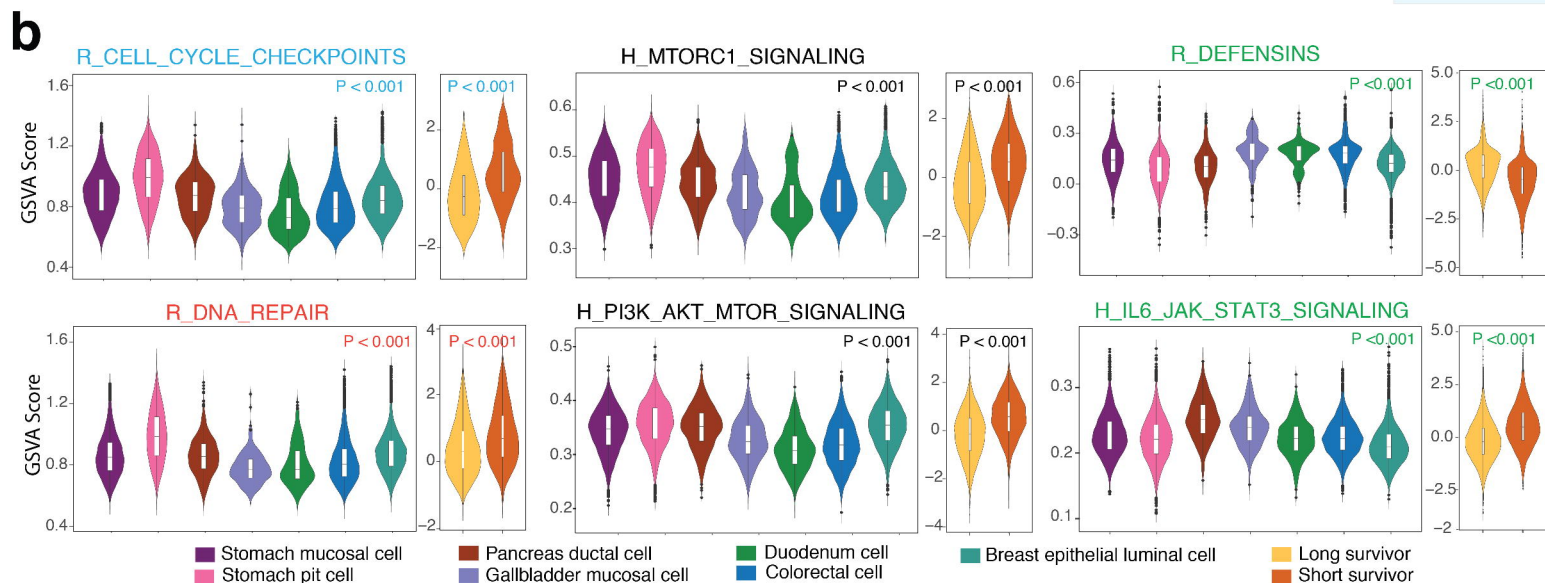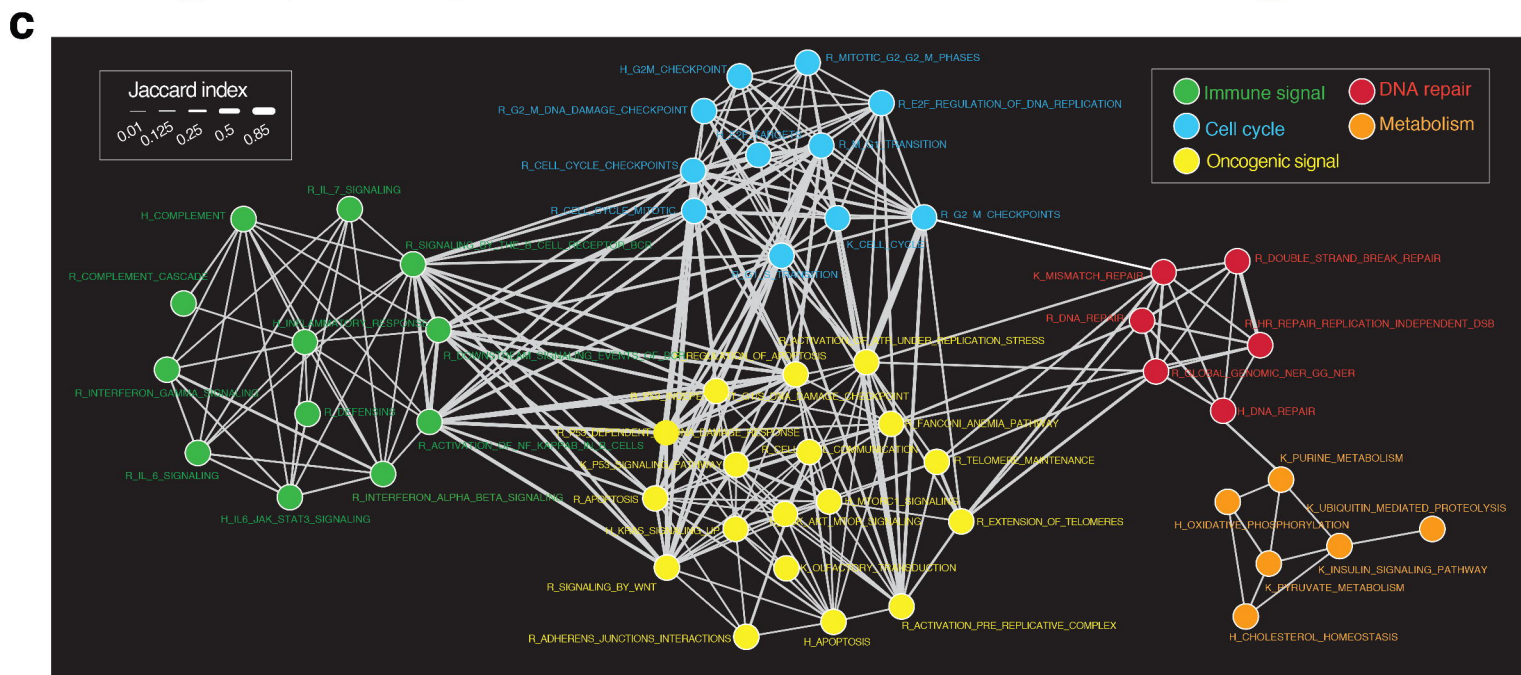

a

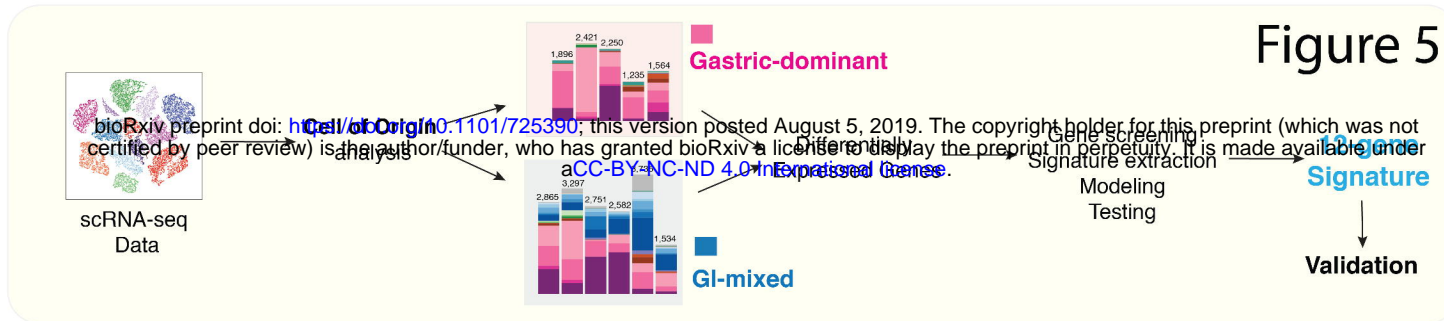

b

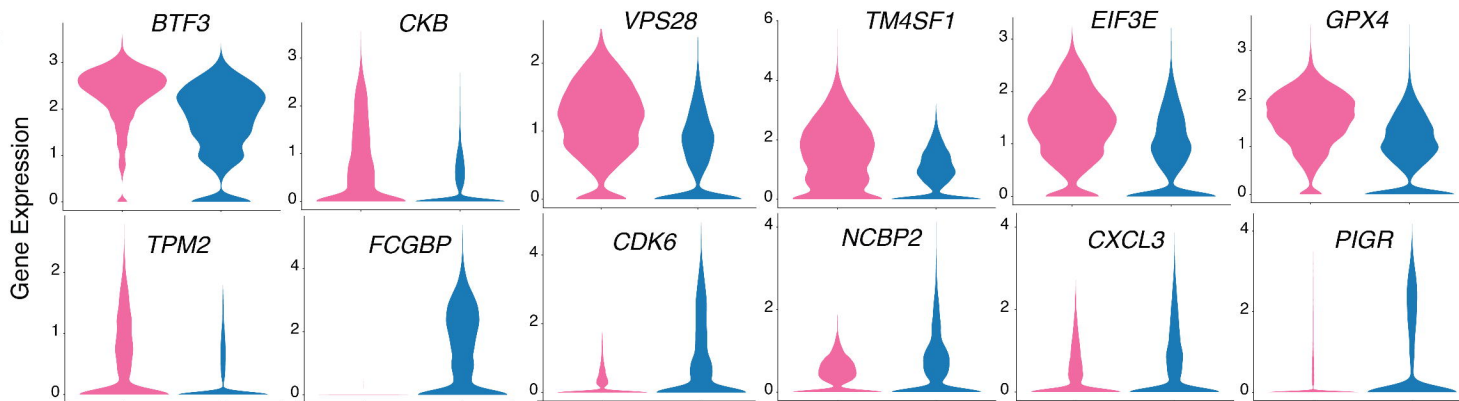

c

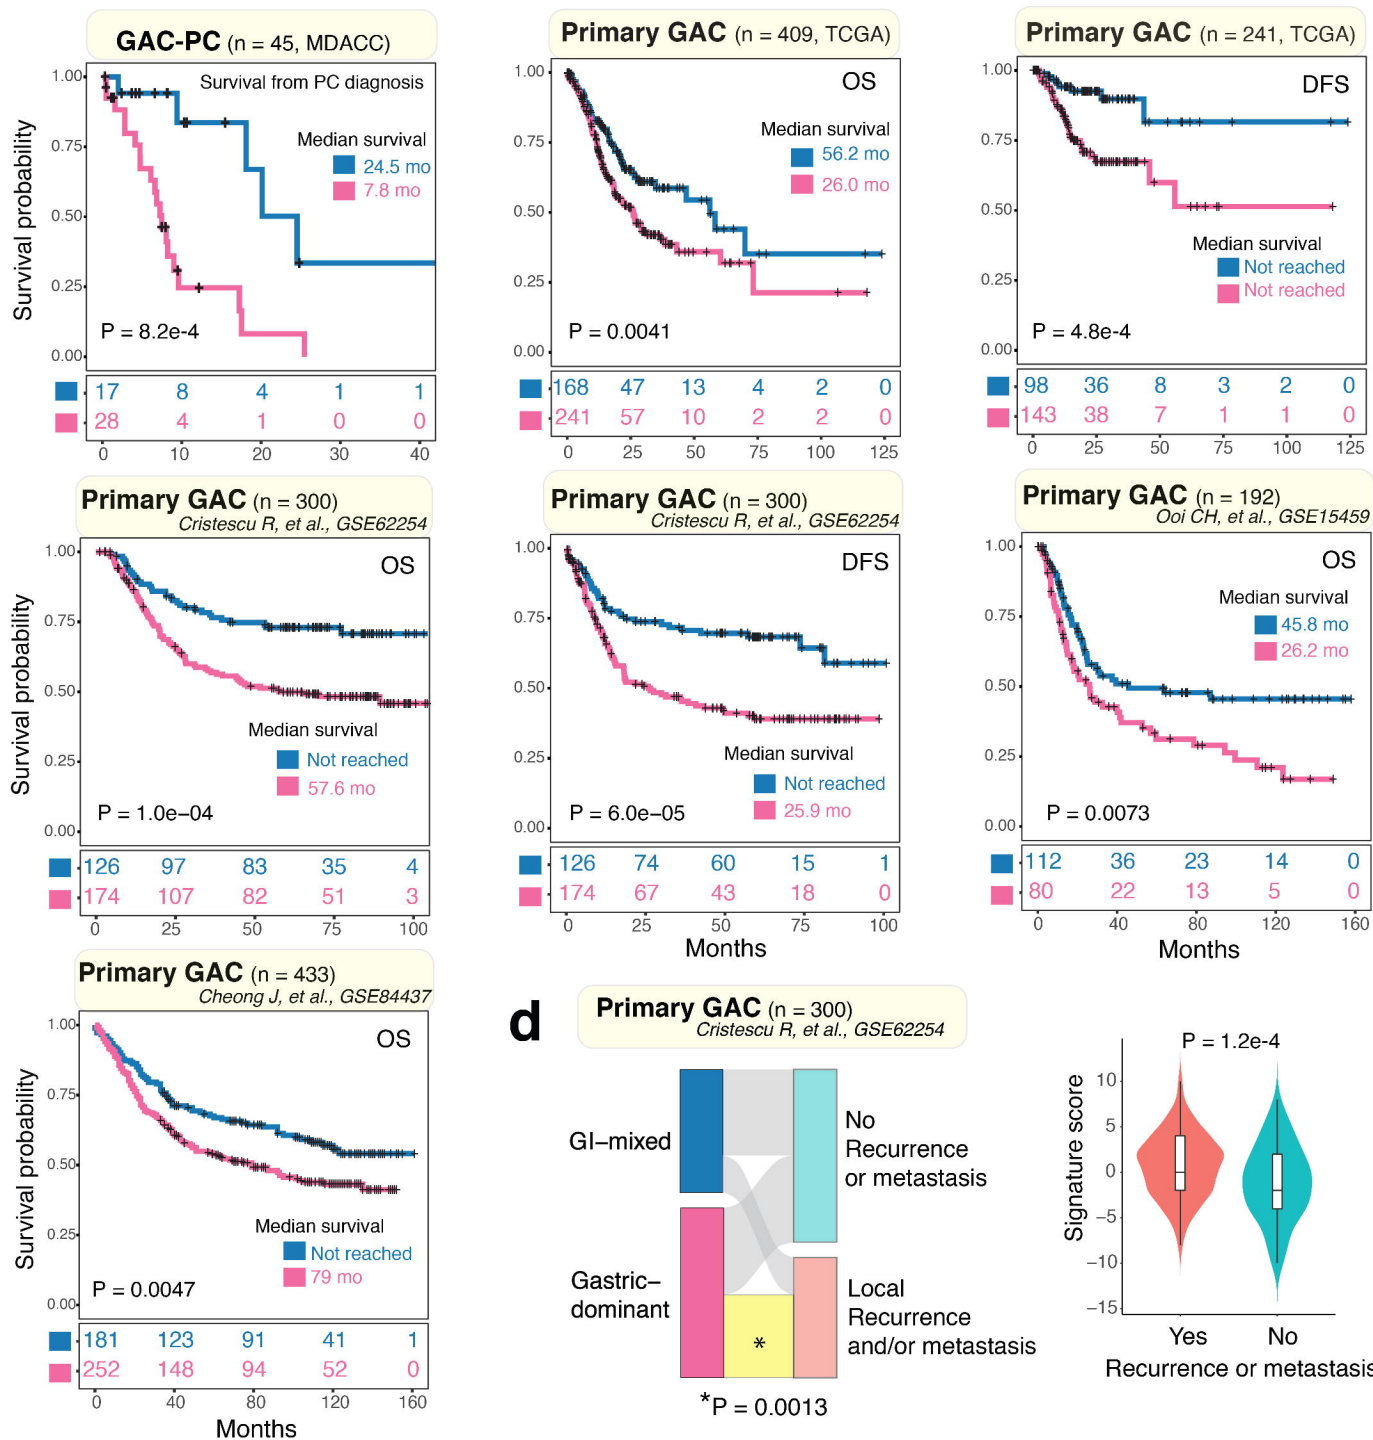

Source: https://biorxiv.org/content/biorxiv/early/2019/08/05/725390.full-text.pdf
